# Supplementary material for: Paradoxical choice and the reinforcing value of information
Source: PubMed Central journal article supplement (PMC9950180; doi:10.1007/s10071-022-01698-2), 2022-10-28
Supplement: 10071_2022_1698_MOESM1_ESM.pdf [file 10071_2022_1698_MOESM1_ESM.pdf]

# Paradoxical choice and the reinforcing value of information

Victor Ajuwon<sup>1,\*</sup>, Andrés Ojeda<sup>1</sup>, Robin A. Murphy<sup>2</sup>, Tiago Monteiro<sup>1,3</sup> and Alex Kacelnik<sup>1,\*</sup>

<sup>1</sup>Department of Biology, University of Oxford, UK

<sup>2</sup>Department of Experimental Psychology, University of Oxford, UK

<sup>3</sup>Domestication Lab, Konrad Lorenz Institute of Ethology, Department of Interdisciplinary Life Sciences, University of Veterinary Medicine Vienna, Austria

\*Correspondence and requests for materials should be addressed to V.A. ([victor.ajuwon@biology.ox.ac.uk](mailto:victor.ajuwon@biology.ox.ac.uk)), or A.K. ([alex.kacelnik@biology.ox.ac.uk](mailto:alex.kacelnik@biology.ox.ac.uk)).

## Online resource 1 - Supplementary materials

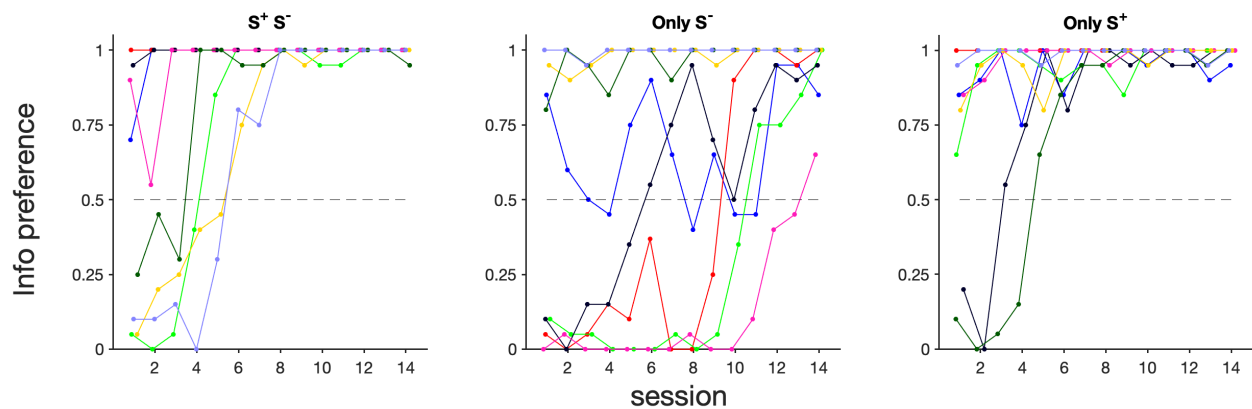

**Figure S1. Individual preferences for the *Info* option.** Proportion of observed preferences in the  $S^+ S^-$  ( $n = 8$ ), Only  $S^-$  ( $n = 8$ ) and Only  $S^+$  ( $n = 8$ ) groups are shown. Each colour represents a different individual for each group.

|          | <b>Treatment</b>                   |                           |                           |
|----------|------------------------------------|---------------------------|---------------------------|
|          | <i>S<sup>+</sup>_S<sup>-</sup></i> | <i>Only_S<sup>-</sup></i> | <i>Only_S<sup>+</sup></i> |
| $\alpha$ | 4.22 (4.06- 4.4)                   | 10.78 (8.531- 13.03)      | 2.09 (-1.765 -5.95)       |
| $\beta$  | 1.68 (1.47 - 1.89)                 | 2.69 (1.70 - 3.70)        | 3.27 (1.201- 5.34)        |
| $\gamma$ | 0.49 (0.46 - 0.51)                 | 0.48 (0.44 - 0.53)        | 0.48 (0.01 - 0.95)        |

**Table S1. Estimated parameter values from sigmoidal Gaussian curves fit to mean *Info* preference data in the main experiment.**  $\alpha$  gives the inflection point,  $\beta$  the slope at the inflection point, and  $\gamma$  the lower bound of the curves. The upper bound given by  $1-\lambda$  was set at 1. 95% confidence bounds are given in brackets.
